# Supplementary material for: Healthcare Utilization and Costs after Receiving a Positive BRCA1/2 Result from a Genomic Screening Program
Source: PubMed Central journal article supplement (PMC7151600; doi:10.3390/jpm10010007), 2020-02-03
Supplement: jpm-10-00007-s001.pdf [file jpm-10-00007-s001.pdf]

**Table S1. Codes Used to Identify *BRCA1/BRCA2* Risk-Reducing Surgical Procedures, Imaging Procedures, and Chemoprevention**

| <b>Procedure</b>                        | <b>Codes</b>                                                                                                                                                                     | <b>Code System</b>               |
|-----------------------------------------|----------------------------------------------------------------------------------------------------------------------------------------------------------------------------------|----------------------------------|
| <b>Mastectomy</b>                       | 13101, 19126, 19296, 19297, 19300, 19301, 19302, 19303, 19304, 19305, 19306, 19307, 19316                                                                                        | CPT                              |
| <b>Oophorectomy</b>                     | 49320, 58150, 58200, 58262, 58542, 58544, 58550, 58570, 58571, 58573, 58660, 58661, 58662, 58720, 58940, 58943, 58950, 58953, 58956, 59150, 59151                                | CPT                              |
| <b>Magnetic Resonance Imaging (MRI)</b> | 76093, 77058, 19085, 76094, 77058, 77059, 19287, 76094, 77021                                                                                                                    | CPT                              |
| <b>Mammography</b>                      | 76090, 76091, 76092, 77051, 77052, 77055, 77056, 77057, 77061, 77062, 77063, 77065, 77066, 77067, G0202, G0204, G0206, G0279                                                     | CPT                              |
| <b>Chemoprevention</b>                  | V07.51                                                                                                                                                                           | ICD-9                            |
|                                         | Z79.810                                                                                                                                                                          | ICD-10                           |
|                                         | 202735, 202677, 541010, 229467, 41851, 15095, 540356, 31102, 540992, 227723, 20941, 229249, 227794, 202570, 202519, 229250, 42652, 42646, 201712, 229251, 208555, 229252, 208748 | Medication Identification Number |

Note: Additional system-specific Electronic Health Record (EHR) codes were applied in some cases.

CPT, Current Procedural Terminology.
